# Supplementary material for: Alkynyl-functionalized gold NHC complexes and their coinage metal clusters
Source: Royal Society of Chemistry journal article supplement (doi:10.1039/c5dt02228b), 2015-01-01
Supplement: c5dt02228b1.pdf [file c5dt02228b1.pdf]

## Supplementary Information

### Alkynyl-functionalized Gold NHC Complexes and Their Coinage

#### Metal Clusters

Claude Kiefer,<sup>a</sup> Sebastian Bestgen,<sup>a</sup> Michael T. Gamer,<sup>a</sup> Sergei Lebedkin,<sup>b</sup> Manfred M. Kappes\*<sup>b</sup> and  
P. W. Roesky\*<sup>a</sup>

[a] Institute of Inorganic Chemistry, Karlsruhe Institute of Technology (KIT), Engesserstraße 15, 76131  
Karlsruhe (Germany), Fax: (+49) 721 6084 4854, E-mail: [roesky@kit.edu](mailto:roesky@kit.edu)

[b] Institute of Physical Chemistry, Karlsruhe Institute of Technology (KIT), Fritz-Haber Weg 2, 76131  
Karlsruhe (Germany) and Institute of Nanotechnology, Karlsruhe Institute of Technology (KIT),  
Hermann-von-Helmholtz-Platz 1, 76021 Karlsruhe (Germany).

#### Table of content

|                                      |    |
|--------------------------------------|----|
| Crystallographic appendix .....      | S2 |
| Photoluminescence measurements ..... | S4 |

## Crystallographic appendix

**Table S1:** Crystal data and structure refinement for **2, 3, 4, 6, 7** and **8**.

| Identification code                         | <b>2</b>                                                      | <b>3</b>                                                      | <b>4</b>                                                      | <b>6</b>                                                       | <b>7</b>                                                                                       | <b>8</b>                                                                                       |
|---------------------------------------------|---------------------------------------------------------------|---------------------------------------------------------------|---------------------------------------------------------------|----------------------------------------------------------------|------------------------------------------------------------------------------------------------|------------------------------------------------------------------------------------------------|
| Empirical formula                           | C <sub>21</sub> H <sub>21</sub> BrN <sub>2</sub>              | C <sub>21</sub> H <sub>20</sub> AuClN <sub>2</sub>            | C <sub>21</sub> H <sub>20</sub> AuBrN <sub>2</sub>            | C <sub>29</sub> H <sub>25</sub> AuN <sub>2</sub>               | C <sub>91</sub> H <sub>72</sub> Au <sub>4</sub> Cl <sub>2</sub> Cu <sub>2</sub> N <sub>4</sub> | C <sub>91</sub> H <sub>72</sub> Ag <sub>2</sub> Au <sub>4</sub> Cl <sub>2</sub> N <sub>4</sub> |
| Formula weight                              | 381.31                                                        | 532.81                                                        | 577.27                                                        | 598.48                                                         | 2207.37                                                                                        | 2296.03                                                                                        |
| Temperature/K                               | 100                                                           | 200                                                           | 200                                                           | 150                                                            | 150                                                                                            | 200                                                                                            |
| Crystal system                              | monoclinic                                                    | monoclinic                                                    | monoclinic                                                    | monoclinic                                                     | triclinic                                                                                      | triclinic                                                                                      |
| Space group                                 | P2 <sub>1</sub> /c                                            | C2/c                                                          | I2/a                                                          | P2 <sub>1</sub> /c                                             | P-1                                                                                            | P-1                                                                                            |
| a/Å                                         | 11.9360(5)                                                    | 27.2118(10)                                                   | 18.6744(7)                                                    | 21.8656(19)                                                    | 11.2232(18)                                                                                    | 11.3173(6)                                                                                     |
| b/Å                                         | 17.1639(10)                                                   | 10.5894(5)                                                    | 10.5567(6)                                                    | 25.3354(18)                                                    | 11.3107(18)                                                                                    | 11.3624(6)                                                                                     |
| c/Å                                         | 8.9095(3)                                                     | 18.6024(7)                                                    | 20.2408(8)                                                    | 18.1177(15)                                                    | 16.682(3)                                                                                      | 16.9117(9)                                                                                     |
| α/°                                         | 90                                                            | 90                                                            | 90                                                            | 90                                                             | 106.416(13)                                                                                    | 108.028(4)                                                                                     |
| β/°                                         | 91.527(3)                                                     | 132.759(2)                                                    | 91.555(3)                                                     | 99.562(7)                                                      | 96.847(13)                                                                                     | 96.042(4)                                                                                      |
| γ/°                                         | 90                                                            | 90                                                            | 90                                                            | 90                                                             | 104.649(14)                                                                                    | 105.373(4)                                                                                     |
| Volume/Å <sup>3</sup>                       | 1824.63(14)                                                   | 3935.7(3)                                                     | 3988.8(3)                                                     | 9897.3(14)                                                     | 1923.4(6)                                                                                      | 1951.90(19)                                                                                    |
| Z                                           | 4                                                             | 8                                                             | 8                                                             | 16                                                             | 1                                                                                              | 1                                                                                              |
| ρ <sub>calc</sub> /cm <sup>3</sup>          | 1.388                                                         | 1.798                                                         | 1.923                                                         | 1.607                                                          | 1.906                                                                                          | 1.953                                                                                          |
| μ/mm <sup>a</sup>                           | 2.257                                                         | 7.617                                                         | 9.385                                                         | 5.963                                                          | 8.261                                                                                          | 8.097                                                                                          |
| F(000)                                      | 784.0                                                         | 2048.0                                                        | 2192.0                                                        | 4672.0                                                         | 1054.0                                                                                         | 1090.0                                                                                         |
| Crystal size/mm <sup>3</sup>                | 0.575 × 0.241 × 0.06                                          | 0.094 × 0.047 × 0.019                                         | 0.299 × 0.23 × 0.166                                          | 0.412 × 0.312 × 0.174                                          | 0.48 × 0.299 × 0.073                                                                           | 0.214 × 0.113 × 0.05                                                                           |
| Radiation                                   | MoKα (λ = 0.71073)                                             | MoKα (λ = 0.71073)                                                                             | MoKα (λ = 0.71073)                                                                             |
| 2θ range for data collection/°              | 3.414 to 52.09                                                | 4.078 to 52.202                                               | 4.352 to 51.996                                               | 2.79 to 51.242                                                 | 3.832 to 54.296                                                                                | 3.812 to 52.11                                                                                 |
| Index ranges                                | -14 ≤ h ≤ 11, -21 ≤ k ≤ 21, -11 ≤ l ≤ 10                      | -33 ≤ h ≤ 33, -13 ≤ k ≤ 13, -22 ≤ l ≤ 22                      | -20 ≤ h ≤ 22, -13 ≤ k ≤ 13, -24 ≤ l ≤ 24                      | -25 ≤ h ≤ 26, -30 ≤ k ≤ 30, -21 ≤ l ≤ 21                       | -14 ≤ h ≤ 14, -12 ≤ k ≤ 14, -21 ≤ l ≤ 21                                                       | -13 ≤ h ≤ 13, -12 ≤ k ≤ 14, -20 ≤ l ≤ 20                                                       |
| Reflections collected                       | 9675                                                          | 34765                                                         | 13935                                                         | 112058                                                         | 17364                                                                                          | 14184                                                                                          |
| Independent reflections                     | 3586 [R <sub>int</sub> = 0.0939, R <sub>sigma</sub> = 0.0973] | 3883 [R <sub>int</sub> = 0.1391, R <sub>sigma</sub> = 0.0784] | 3881 [R <sub>int</sub> = 0.0398, R <sub>sigma</sub> = 0.0355] | 18432 [R <sub>int</sub> = 0.0559, R <sub>sigma</sub> = 0.0393] | 8344 [R <sub>int</sub> = 0.0600, R <sub>sigma</sub> = 0.0820]                                  | 7473 [R <sub>int</sub> = 0.0625, R <sub>sigma</sub> = 0.1002]                                  |
| Data/restraints/parameters                  | 3586/0/220                                                    | 3883/0/229                                                    | 3881/0/229                                                    | 18432/0/1165                                                   | 8344/0/526                                                                                     | 7473/96/541                                                                                    |
| Goodness-of-fit on F <sup>2</sup>           | 0.938                                                         | 0.859                                                         | 0.867                                                         | 0.896                                                          | 0.809                                                                                          | 0.905                                                                                          |
| Final R indexes [I >= 2σ(I)]                | R <sub>1</sub> = 0.0595, wR <sub>2</sub> = 0.1367             | R <sub>1</sub> = 0.0403, wR <sub>2</sub> = 0.0760             | R <sub>1</sub> = 0.0203, wR <sub>2</sub> = 0.0375             | R <sub>1</sub> = 0.0240, wR <sub>2</sub> = 0.0362              | R <sub>1</sub> = 0.0297, wR <sub>2</sub> = 0.0475                                              | R <sub>1</sub> = 0.0432, wR <sub>2</sub> = 0.0786                                              |
| Final R indexes [all data]                  | R <sub>1</sub> = 0.0919, wR <sub>2</sub> = 0.1519             | R <sub>1</sub> = 0.1096, wR <sub>2</sub> = 0.0943             | R <sub>1</sub> = 0.0419, wR <sub>2</sub> = 0.0405             | R <sub>1</sub> = 0.0434, wR <sub>2</sub> = 0.0390              | R <sub>1</sub> = 0.0602, wR <sub>2</sub> = 0.0517                                              | R <sub>1</sub> = 0.0940, wR <sub>2</sub> = 0.0904                                              |
| Largest diff. peak/hole / e Å <sup>-3</sup> | 0.90/-0.85                                                    | 1.18/-0.48                                                    | 0.29/-0.91                                                    | 1.06/-0.70                                                     | 1.03/-1.26                                                                                     | 1.00/-1.30                                                                                     |

Complexes **7** and **8** both crystallized together with dichloromethane in the lattice.

Crystallographic data (excluding structure factors) for the structures reported in this paper have been deposited with the Cambridge Crystallographic Data Centre as a supplementary publication no. CCDC 1059550-1059555. Copies of the data can be obtained free of charge on application to CCDC, 12 Union Road, Cambridge CB21EZ, UK (fax: +(44)1223-336-033; email: [deposit@ccdc.cam.ac.uk](mailto:deposit@ccdc.cam.ac.uk)).

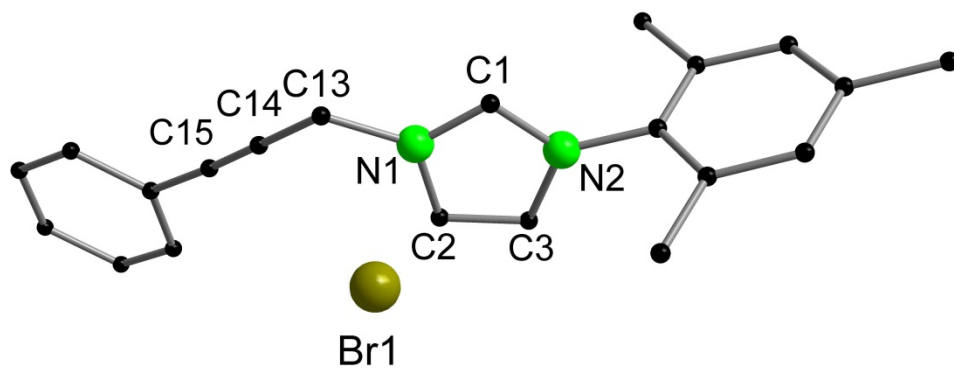

Fig. S1 Crystal structure of the imidazolium salt 2.

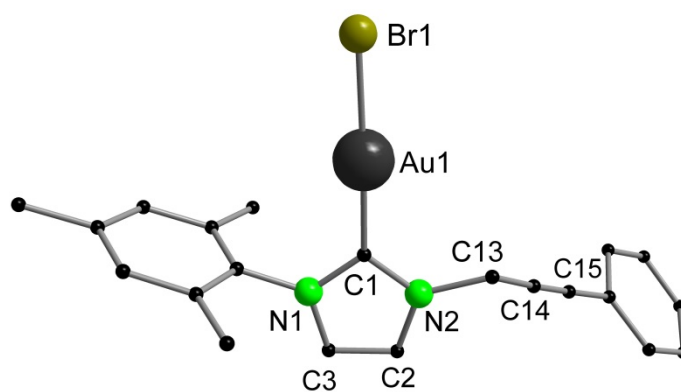

## Photoluminescence measurements

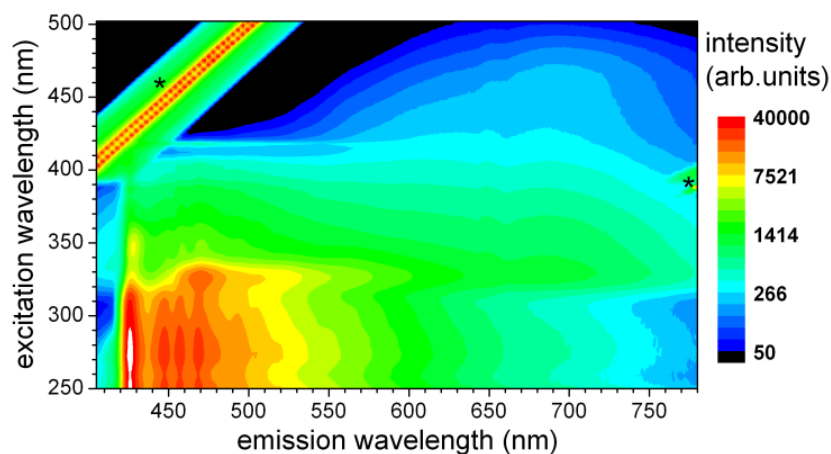

**Fig. S2** Photoluminescence map (color-coded PL intensity vs. excitation and emission wavelengths) of solid complex **6** at  $T = 20$  K. Emission was guided through a 400 nm longpass filter. The asterisks indicate the first and second order excitation lines above  $\lambda_{\text{exc}} \sim 400$  nm.

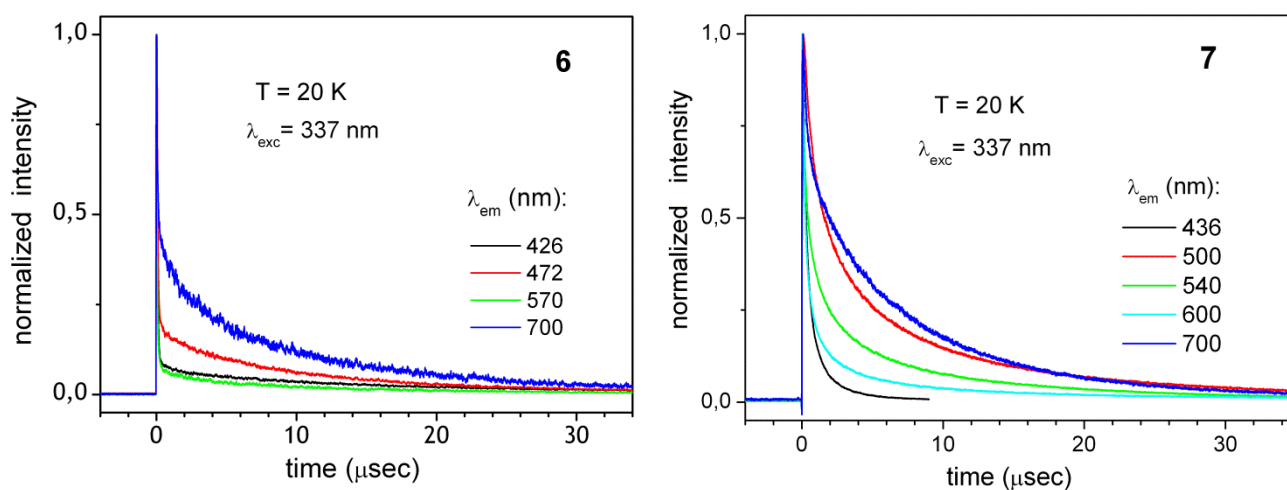

**Fig. S3** PL decay curves recorded for solid **6** and **7** at different emission wavelengths under nsec-pulsed excitation at 337 nm ( $N_2$ -laser) and  $T = 20$  K.

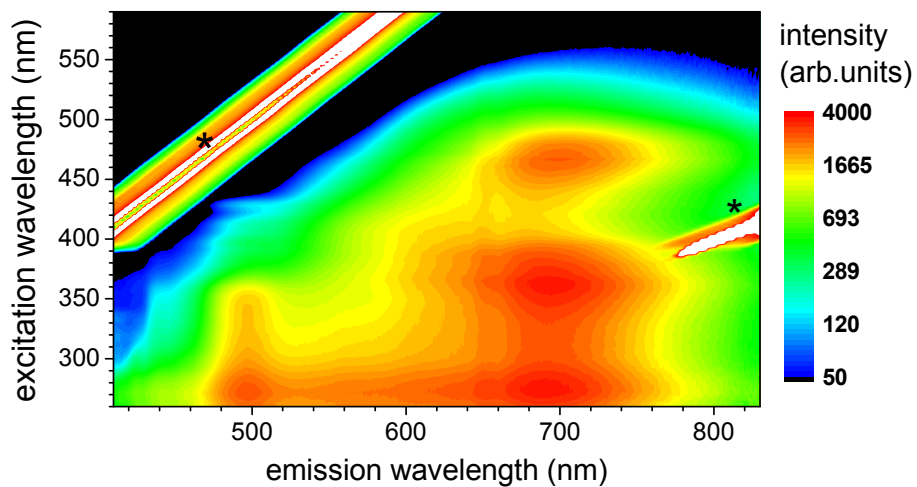

**Fig. S4** Photoluminescence map (color-coded PL intensity vs. excitation and emission wavelengths) of solid complex **7** at  $T = 20$  K. The map was recorded after several months storage of the sample (under ambient conditions, in dark) and reveals an enhanced red emission at  $\sim 700$  nm as compared to the freshly prepared sample (cf. Fig. 7 in text). The asterisks indicate the first and second order excitation lines.
